# Supplementary material for: Multi-omics insight into the molecular networks of mental disorder related genetic pathways in the pathogenesis of inflammatory bowel disease
Source: Springer Nature journal article supplement (doi:10.1038/s41398-025-03299-2), 2025-03-21
Supplement: MOESM1 [file 41398_2025_3299_MOESM1_ESM.pdf]

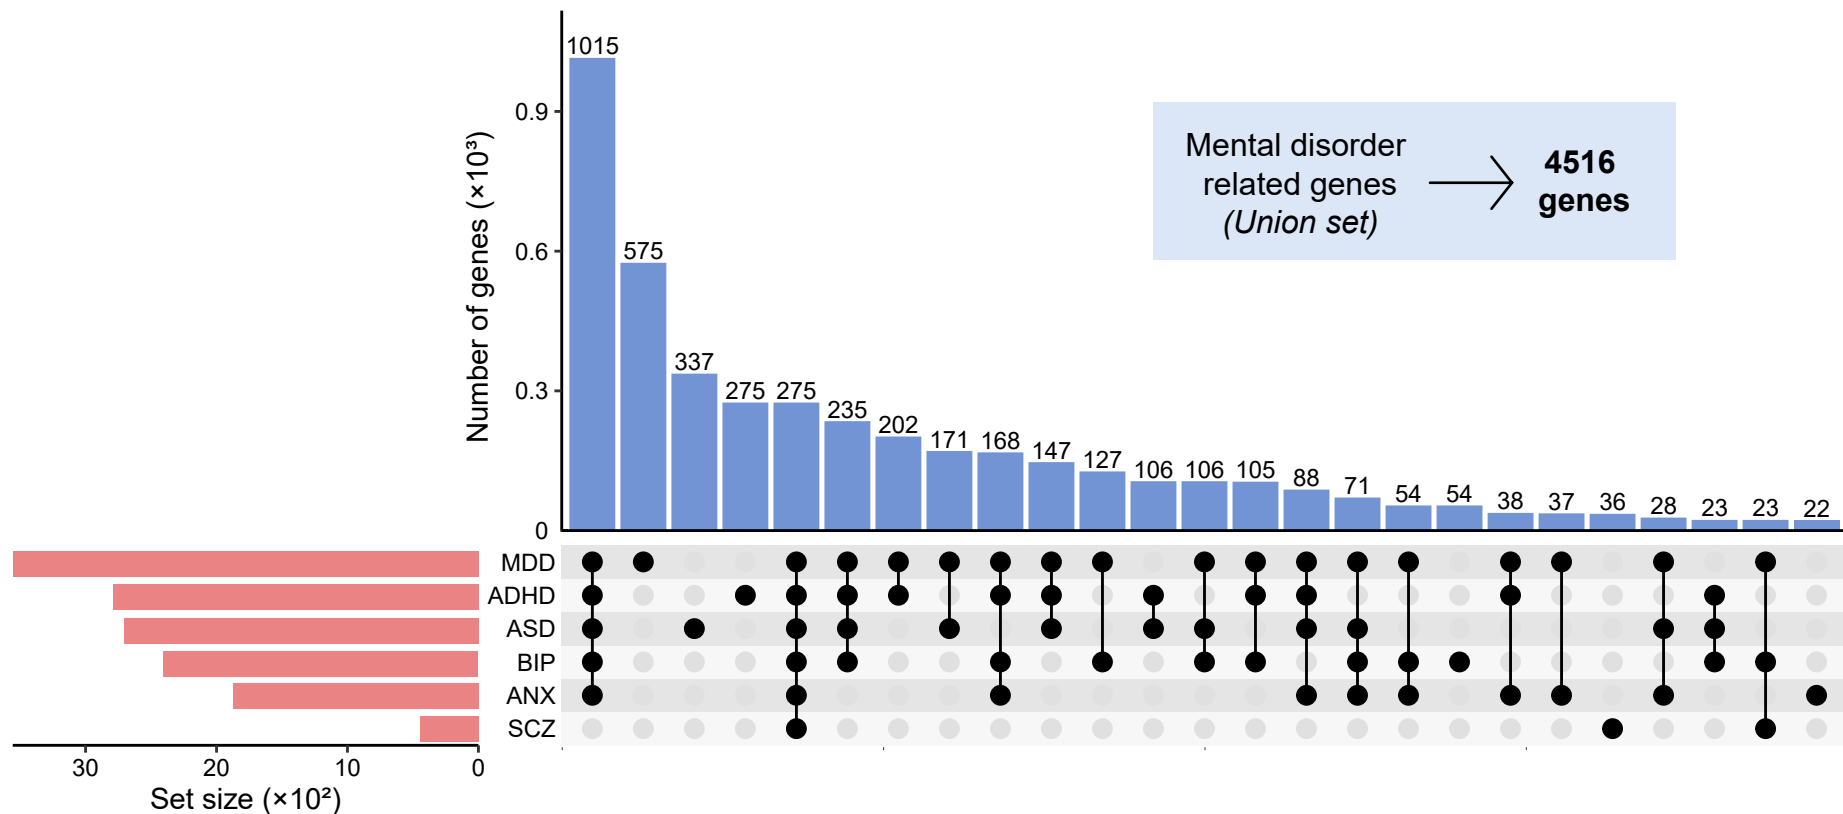

**Fig S1. Candidate mental disorder-related genes.** The UpSet plot exhibited the intersection of genes of six mental disorders.

The union of six sets was identified candidate genes.

Abbreviation: MDD, major depressive disorder, ANX, anxiety disorder, ADHD attention-deficit/hyperactivity disorder, ASD, autism spectrum disorder, BIP, bipolar disorder, SCZ, schizophrenia.
